# Supplementary material
Source: MDPI journal article supplement (https://www.mdpi.com/2073-4344/13/4/715)
Supplement: s1 [file s1]

## Supplementary Material

# Preparation of Co-CNK-OH and Its Performance in Fenton-like Photocatalytic Degradation of Tetracycline

Dongrui Hou<sup>1</sup>, Jing Luo<sup>2</sup>, Qinggong Sun<sup>2</sup>, Mengyang Zhang<sup>1</sup>, Jianfeng Wang<sup>1\*</sup>

1 School of Ecology and Environment, Zhengzhou University, Zhengzhou, 450000, China  
202022392015719 @gs.zzu.edu.cn (D.H.); 202022392015766@gs.zzu.edu.cn (M.Z.)

2 School of Chemical Engineering, Zhengzhou University, Zhengzhou, 450000, China  
20202232014616@gs.zzu.edu.cn (J.L.); 20202232014627@gs.zzu.edu.cn (Q.S.)

\* Correspondence: wangjf@zzu.edu.cn

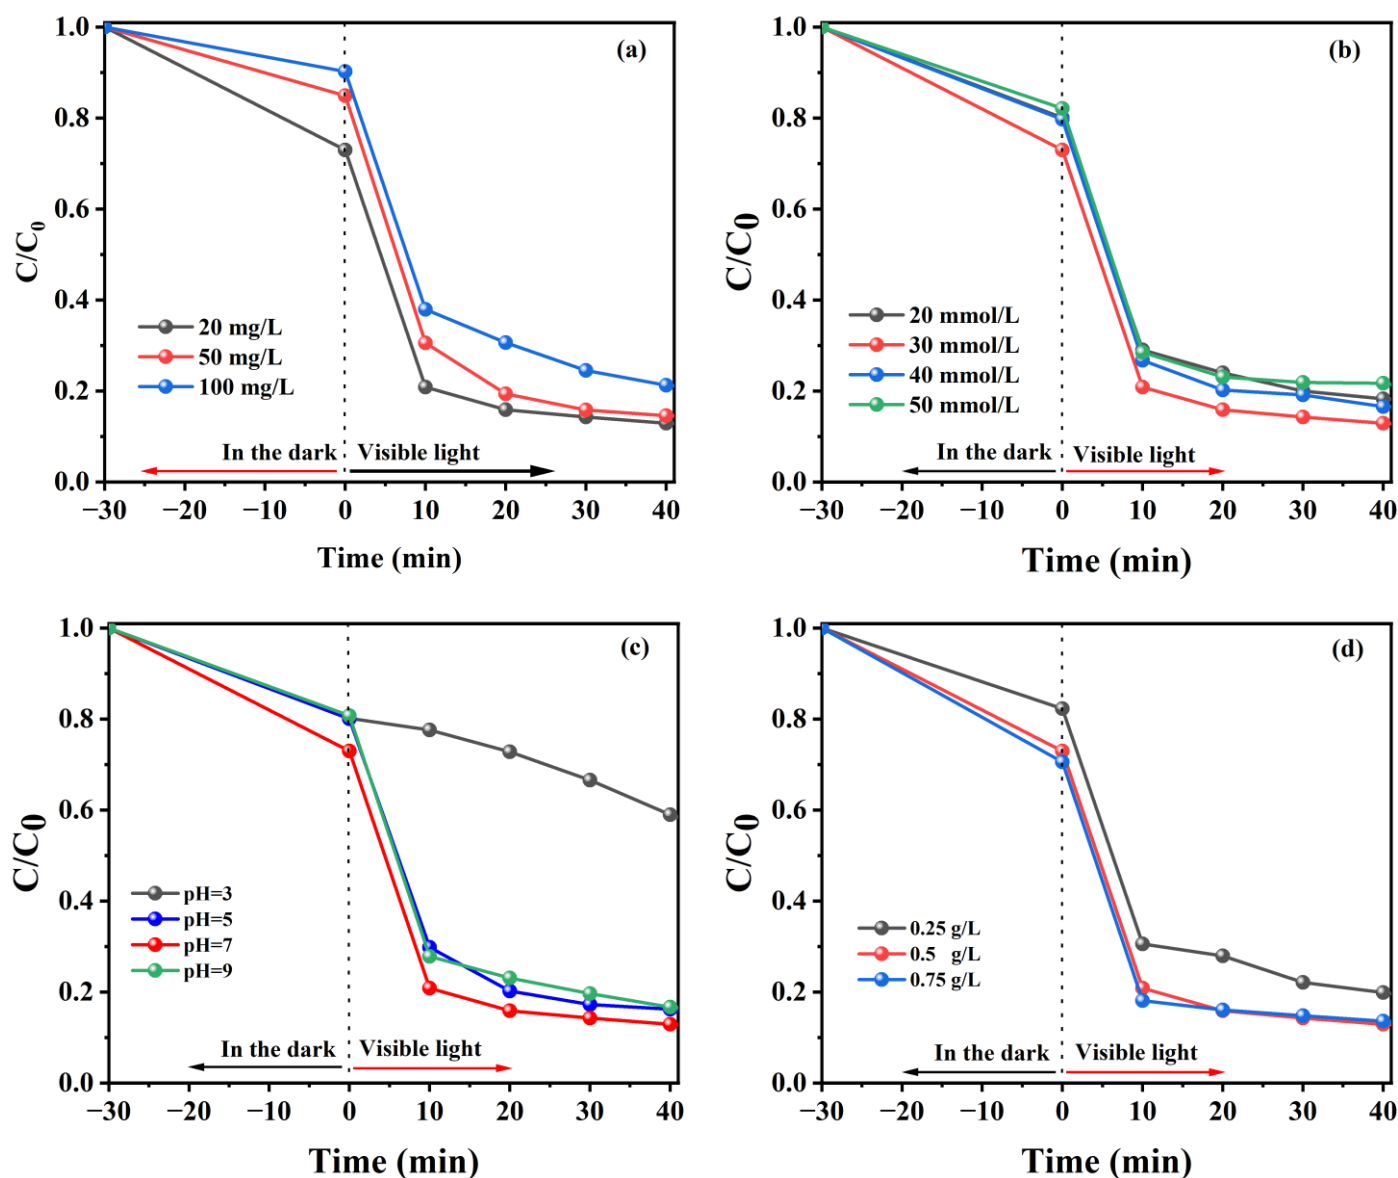

Figure S1. The influence of initial TC concentration(a),  $H_2O_2$  concentration(b), pH value(c) and Catalyst addition (d) on degradation efficiency of TC.
